# Supplementary material for: From Silos to Synergy: Improving Coordination in Local Flood Management
Source: MDPI journal article supplement (doi:10.3390/w17152212), 2025-07-24
Supplement: s1 [file water-3702947-supplementary.pdf › water-3702947-supplementary.pdf]

## Supplementary material—Interview guideline

---

### Block 1: Heavy rain fall events

---

Können Sie erläutern, welche Starkregenereignisse es in der Vergangenheit bereits gab?

*Could you explain which heavy rainfall events have occurred in the past?*

- Welche Arten von Schäden sind hauptsächlich aufgetreten?  
*What types of damage have primarily occurred?*
- Welche Stellen waren bei den Ereignissen besonders betroffen?  
*Which areas were particularly affected during these events?*
  - Waren beide Stadtteile betroffen?  
*Were both districts affected?*
  - Wie hoch stand das Wasser in etwa in den Straßen etc.?  
*How high did the water rise in the streets, etc.?*
- Waren kritische und sensible Infrastruktureinrichtungen (z. B. Schulen, Kindergärten, Senioreneinrichtungen) betroffen?  
*Were critical and sensitive infrastructure facilities (e.g., schools, kindergartens, senior centers) affected?*
- Wurden die Überschwemmungen allein durch den Starkregen hervorgerufen oder kam es auch zu fluvialem Hochwasser an den Bächen?  
*Were the floods caused solely by heavy rainfall, or was there also fluvial flooding from the streams?*
- Sind die festgesetzten Überschwemmungsgebiete in der Vergangenheit bereits überschwemmt worden?  
*Have the designated flood-prone areas been flooded in the past?*
- An welchen Stellen sehen Sie persönlich im Hinblick auf immer stärker werdende Starkregenereignisse Handlungsbedarf?  
*In your view, is there a need for action in light of increasingly intense heavy rainfall events?*

Können Sie erläutern, wie die Registrierung von Starkregen ereignissen erfolgt und und welche Daten in der Regel dokumentiert werden?

*Could you explain how the registration of heavy rainfall events is carried out and what data is usually documented?*

- Welche Daten erfassen Sie und woher stammen die Daten?  
*What data do you collect, and where does it come from?*
- Wird bei der Dokumentation die Öffentlichkeit einbezogen  
*Is the public involved in the documentation process*
- Sind die Daten öffentlich zugänglich?  
*Are the data publicly accessible?*

---

### Block 2: Disaster management

---

Inwiefern wurde bereits das Gefahrenpotenzial hinsichtlich Starkregenereignissen und Hochwasser im Rahmen der Bedarfs- und Entwicklungsplanung der Feuerwehr erfasst?

*To what extent has the risk potential of heavy rainfall events and flooding already been addressed in the fire department's needs and development planning?*

- Gibt es einen Plan o.ä. von potenziell besonders gefährdeten Bereichen?  
*Is there a plan or similar document identifying areas that are particularly at risk?*

Im Juni 2021 wurde eine Arbeitsgruppe bestehend aus Ordnungsamt, Feuerwehr, Stadtwerken und DRK einberufen, die einen Katastrophenschutzplan erarbeitet. Was ist der aktuelle Stand dieses Plans?

*In June 2021, a working group consisting of the public order office, fire department, municipal utilities, and the Red Cross was established to develop a disaster protection plan. What is the current status of this plan?*

- Können Sie erläutern, inwiefern der Plan auch Extremwetterereignisse wie Starkregenereignisse behandelt?  
*Could you explain to what extent the plan addresses extreme weather events such as heavy rainfall?*

Gibt es Alarm- und Einsatzpläne bezüglich des Schutzes vor Hochwasser- und Starkregenereignissen?  
*Are there alarm and deployment plans in place for protection against flooding and heavy rainfall events?*

Können Sie erläutern, welche Absprachen oder Formen der Zusammenarbeit es mit Feuerwehren in der Umgebung gibt in Bezug auf Katastrophenschutz?  
*Could you explain what kinds of agreements or forms of cooperation exist with neighboring fire departments regarding disaster protection?*

---

### Block 3: Waterbodies

---

Pflege, Auffälligkeiten  
*Maintenance and Irregularities*

Der Wasserverbands Schwarzbachgebiet-Ried führt jährliche Begehungen der Gewässer durch.  
*The Schwarzbachgebiet-Ried Water Association conducts annual inspections of the water bodies.*

- Welche Auffälligkeiten gab es bisher bei den Begehungen?  
*What irregularities have been identified during these inspections so far?*
- Welche Pflegemaßnahmen wurden an den Gewässern im Gebiet Mörfelden-Walldorf in den letzten Jahren durchgeführt?  
*What maintenance measures have been carried out on water bodies in the Mörfelden-Walldorf area in recent years?*

Welche Durchlässe/Einleitungsstellen/Brücken werden durch die Stadtwerke regelmäßig kontrolliert?

*Which culverts/inlets/bridges are regularly inspected by the Stadtwerke?*

- Welche Auffälligkeiten gab es bei den Kontrollen?  
*What irregularities have been identified during these inspections?*
- Gibt es Stellen, die besonders häufig von Verklausungen oder anderen Problemen betroffen sind?  
*Are there locations that are particularly frequently affected by blockages or other issues?*

Renaturierung  
*Renaturation*

Gundbach und Hegbach sind Teil des des Renaturierungsförderprogramms „100 wilde Bäche für Hessen“ des Landes Hessen. Welche konkreten Maßnahmen sind in diesem Zuge geplant?  
*The Gundbach and Hegbach streams are part of the State of Hesse's renaturation funding program "100 Wilde Bäche für Hessen". What specific measures are planned as part of this program?*

- Sind weitere Renaturierungsmaßnahmen – unabhängig vom Förderprogramm – geplant?  
*Are additional renaturation measures planned independently of the funding program?*

Welche Renaturierungsmaßnahmen wurden bereits an Gewässern in Mörfelden-Walldorf durchgeführt?

*What renaturation measures have already been carried out on water bodies in Mörfelden-Walldorf?*

- Wie würden Sie den Betrag dieser geplanten und umgesetzten Maßnahmen auf den Hochwasserschutz einschätzen?  
*How would you assess the contribution of the planned and implemented measures to flood protection?*

Hochwasser, Entlastung, Rückhalt

*Flooding, Relief, Retention*

Gibt es Hochwasserschutzmaßnahmen im Gebiet von Mörfelden-Walldorf?

*Are there any flood protection measures in place in the Mörfelden-Walldorf area?*

Können Sie erläutern welche Entlastungsbauwerke es gibt?

*Could you explain what types of relief structures exist?*

- Können Sie die genaue Lage des Regenrückhaltebeckens in Mörfelden westlich des Waldschwimmbads aufzeigen?  
*Could you indicate the exact location of the stormwater retention basin in Mörfelden, west of the outdoor swimming pool?*
- Gibt es neben diesem Regenrückhaltebecken mittlerweile noch weitere?  
*Besides this retention basin, are there now additional ones?*

---

#### Block 4: Strategies, Concepts, Instruments

---

Leitkonzept Klimaschutz

*Climate Protection Master Plan*

Das Leitkonzept Klimaschutz sieht einen themenspezifischen Maßnahmenplan zum Handlungsfeld „Klimaanpassung“ vor.

*The Climate Protection Master Plan includes a thematic action plan for the field of climate adaptation.*

- Wird der Maßnahmenplan aktuell schon erarbeitet oder ist in Planung?  
*Is the action plan currently being developed or is it planned?*
  - Falls ja: Wer erarbeitet ihn?  
*If so: Who is responsible for developing it?*
- Welche Themenfelder werden behandelt?  
*What topics are being addressed?*
- Welche Art von Maßnahmen könnten in dem Maßnahmenplan stehen?  
*What types of measures might be included in the action plan?*
  - Wie konkret sollen die Maßnahmen sein, die vorgeschlagen werden?  
*How specific are the proposed measures expected to be?*
  - Können Sie ein mögliches Beispiel nennen?  
*Could you provide an example?*
- Gibt es bereits eine Arbeitsgruppe zum Themenbereich Klimaanpassung bzw. wann soll diese gegründet werden?

*Is there already a working group on climate adaptation, or when is it planned to be established?*

- Falls ja: Wie ist diese zusammengesetzt und wie sieht ihre Arbeitsweise aus?  
*If so: How is it composed and how does it operate?*

Wurden bereits das Partizipations- und das Kommunikationskonzept erarbeitet?  
*Have the participation and communication concepts already been developed?*

Hat das gesamtstädtische Stadtentwicklungskonzept MöWa 2030 einen Bezug zu Regenwasserbewirtschaftung allgemein und insbesondere dem Umgang mit Starkregenereignissen?  
*Does the Integrated Urban Development Concept "MöWa 2030" include references to rainwater management in general and to dealing with heavy rainfall events in particular?*

- Falls ja: Können Sie dies kurz erläutern?  
*If so: Could you briefly explain this?*
- Falls ja: Welche Akteure waren an der Planung und Umsetzung beteiligt?  
*If so: Which stakeholders were involved in the planning and implementation?*
- Wird die Bevölkerung in die Erarbeitung eingebunden? Wenn ja: In welcher Form?  
*Is the public involved in the development? If so, in what way?*
- Können Sie kurz erläutern wie die Öffentlichkeitsbeteiligung bisher abgelaufen ist und was noch geplant ist?  
*Could you briefly describe how public participation has taken place so far and what is still planned?*
- Inwiefern sollen sich die Inhalte der Maßnahmenpläne, die auf Grundlage des Leitkonzepts Klimaschutz erarbeitet werden, von den Maßnahmen, die im Rahmen des gesamtstädtischen Stadtentwicklungskonzept MöWa 2030 erarbeitet werden, unterscheiden? Oder ist das Leitkonzept Klimaschutz ein Teil von MöWa 2030?  
*To what extent are the action plans developed under the climate protection concept meant to differ from those developed within the "MöWa 2030" urban development concept? Or is the climate protection concept part of MöWa 2030?*

Können Sie kurz den aktuellen Stand der Umsetzung des Innenentwicklungskonzepts erläutern?  
*Can you briefly explain the current status of implementation of the infill development concept?*

- Hat es einen Bezug zu Regenwasserbewirtschaftung allgemein und insbesondere dem Umgang mit Starkregenereignissen?  
*Does it address rainwater management in general and the handling of heavy rainfall events in particular?*
- Welche Akteure waren an der Entwicklung des Innenentwicklungskonzepts beteiligt?  
*Which actors were involved in the development of the infill development concept?*
- Die Potenzialfläche M-01 befindet sich in einem Überschwemmungsgebiet, eine Bebauung wäre demnach in der Regel nicht erlaubt. Wurde die Fläche aus bestimmten Gründen trotzdem mit aufgenommen?  
*The potential area M-01 is located in a floodplain, which would usually prohibit development. Was the area included for specific reasons?*

Weitere Strategien/Konzepte mit Bezug zu Starkregen & Regenwasserbewirtschaftung  
*Further Strategies/Concepts Related to Heavy Rainfall & Rainwater Management*

Gibt es schon Strategien oder Konzepte in Bezug auf Starkregen oder in Bezug auf dezentrale Regenwasserbewirtschaftung für das gesamte Stadtgebiet?

*Are there already strategies or concepts addressing heavy rainfall or decentralized rainwater management for the entire city?*

- Welche Akteure waren an der Planung und Umsetzung beteiligt? Wird die Bevölkerung in die Erarbeitung eingebunden? Falls ja, in welcher Form?  
*Which stakeholders were involved in planning and implementation? Is the public involved in the development? If yes, in what form?*

Gab es bereits politische Beschlüsse zu diesem Thema?

*Have there already been political resolutions on this topic?*

Es gibt in Bezug auf Regenwasserbewirtschaftung zwei politische Anträge, die in der Stadtverordnetenversammlung im Dezember auf der Tagesordnung standen: Den Haushaltsantrag „Regenwassernutzung und -versickerung fördern“ und den Prüfantrag „Umsetzung Schwammstadt-Konzept“.

*There are two political motions regarding rainwater management that were on the city council agenda in December: The budget motion “Promoting Rainwater Use and Infiltration” and the inquiry motion “Implementation of the Sponge City Concept.”*

- Der Magistrat ist jeweils für die Erarbeitung zuständig. Wird die Verwaltung auch involviert?  
The city council is responsible for developing these. Is the municipal administration also involved?
- Im Prüfantrag „Umsetzung Schwammstadt-Konzept“ steht: „Im Zuge der städtischen Klimaanpassungsstrategie wurden bereits erste Maßnahmen für das Handlungsfeld Wasser/Niederschläge auf den Weg gebracht.“  
The inquiry motion states: “As part of the municipal climate adaptation strategy, initial measures have already been initiated in the field of water/precipitation.”
- Wissen Sie welche Strategie und welche Maßnahmen damit gemeint sind?  
Do you know which strategy and which measures this refers to?

## **Instrumente**

### **Instruments**

Bebauungspläne wurden in Mörfelden-Walldorf schon häufig genutzt, um Niederschlagsversickerung verpflichtend festzuschreiben. Auch Dachbegrünung wird teilweise vorgeschrieben.

*Development plans in Mörfelden-Walldorf have frequently been used to mandate rainwater infiltration. Green roofs are also sometimes required.*

- Wie kam es dazu, dass Versickerung in Bebauungsplänen oft festgeschrieben wird? War es eine politische Entscheidung oder eher die Entscheidung von Personen aus der Verwaltung, die Maßnahmen mit aufzunehmen?  
*How did it come about that infiltration was often mandated in development plans? Was this a political decision or driven by individual administrative staff?*
- Gibt es bestimmte Akteure, die das Thema bei der Aufstellung von Bebauungsplänen in der Regel einbringen?  
*Are there specific actors who typically advocate for these measures in the planning process?*
- Sind Änderung von existierenden Bebauungsplänen umgesetzt worden bzw. sind solche noch geplant?  
*Have changes to existing development plans been implemented, or are any planned?*
- Im Bebauungsplan Nr.46.1 Teil A „Gewerbe- und Industriegebiet Mörfelden-Ost, 1. Änderung, Teil A“ sind auch Dachbegrünung und Fassadenbegrünung unter gewissen Bedingungen vorgeschrieben. Ist vorgesehen in Zukunft noch weitere Maßnahmen in

Bebauungsplänen festzusetzen? Im Entwurf für die Waldenser Mitte sind bspw. Retentionsdächer vorgesehen – sollen diese auch im Bebauungsplan festgesetzt werden?  
*Development Plan No. 46.1 Part A "Commercial and Industrial Area Mörfelden-East, 1st Amendment, Part A," green roofs and green facades are also required under certain conditions. Is it planned to include further measures in future development plans? For example, retention roofs are included in the draft for Waldenser Mitte — will these also be mandated in the development plan?*

Wurden in der Vergangenheit auch schon andere Instrumente zur Festsetzung von Maßnahmen zur dezentralen Regenwasserbewirtschaftung eingesetzt, wie z. B. städtebauliche Verträge?  
*Have other instruments already been used to implement decentralized rainwater management measures in the past, such as urban development contracts?*

Bereits in den 90er Jahren wurde eine Niederschlagswassersatzung für das Baugebiet „Plassage/Lange Äcker“ verfasst, durch die die Versickerung von Niederschlagswasser geregelt wird.  
*As early as the 1990s, a Drainage Ordinance was created for the development area "Plassage/Lange Äcker," regulating rainwater infiltration.*

- Wer hat diese Satzung erarbeitet?  
*Who developed this Ordinance?*
- Gab es noch weitere Niederschlagswassersatzungen oder ähnliche Konzepte für Neubaugebiete?  
*Have there been other similar instruments for new development areas?*

Arbeitsweise der Verwaltung  
*Administrative Procedures*

Gibt es eine Person, die für die Koordination zum Thema Starkregen zuständig ist, wie z. B. einen „Überflutungsschutzbeauftragten“?  
*Is there a dedicated person responsible for coordination on the topic of heavy rainfall, such as a "flood protection officer"?*

Gibt es zum Thema Starkregen oder Regenwasserbewirtschaftung eine „ressortübergreifende“ Arbeitsgruppe, einen runden Tisch, einen Koordinierungskreis oder ähnliches?  
*Is there an interdepartmental working group, a round table, a coordination circle, or something similar on the topic of heavy rainfall or rainwater management?*

- Wenn ja: Wie ist diese zusammengesetzt?  
*If so: How is it composed?*
- Wenn ja: Wie sieht die Arbeitsweise aus?  
*If so: What is its mode of operation?*

Was sind die Aufgaben des Klimaschutzbeauftragten in Bezug auf Klimaanpassung?  
*What are the tasks of the climate protection officer regarding climate adaptation?*

Hat sich Ihre Arbeitsweise nach dem Starkregenereignis 2007 oder dem Ereignis im Ahrtal verändert? Haben sich Rahmenbedingungen geändert?  
*Has your working approach changed following the 2007 heavy rainfall event or the Ahr Valley disaster? Have the overall conditions changed?*

Findet eine Zusammenarbeit oder ein Erfahrungsaustausch mit anderen Kommunen im Kreis Groß-Gerau oder dem Kreis Groß-Gerau statt?

*Is there collaboration or an exchange of experiences with other municipalities in the Groß-Gerau district?*

Was sind Ihrer Meinung nach Hemmnisse in Bezug auf die Konzipierung und Umsetzung von Maßnahmen zur Überflutungsvorsorge?

*In your opinion, what are the main obstacles to the planning and implementation of flood prevention measures?*

---

## Themenblock 5: Bauliche Maßnahmen

---

### Private Flächen

#### *Private areas*

Über das Förderprogramm „Stadtgrün statt Graustadt“, das ab dem nächsten Jahr starten soll, werden auch Maßnahmen gefördert, durch die Niederschlagswasser zurückgehalten wird, wie z. B. Gründächer und Entsiegelung.

*The funding program „Stadtgrün statt Graustadt“, which is scheduled to start next year, also supports measures that help retain rainwater, such as green roofs and surface unsealing.*

- Wer hat das Förderprogramm entwickelt?  
*Who developed this funding program?*
- Wie wird das Förderprogramm bisher angenommen, gibt es viele Anfragen?  
*How has the program been received so far? Are there many inquiries?*
- Gibt es darüber hinaus weitere Angebote für die Bevölkerung, die zur Klimawandelanpassung anregen sollen?  
*Are there additional programs or initiatives available to the public that aim to encourage climate adaptation?*

Beispiel: Versickerung im Baugebiet Plassage/Lange Äcker: Welche weiteren Maßnahmen sind Ihnen bekannt, die auf privaten Flächen umgesetzt wurden?

*Example: Infiltration in the “Plassage/Lange Äcker” development area: What other measures are you aware of that have been implemented on private properties?*

- Wurden die Maßnahmen aufgrund von Vorgaben der Stadt – z. B. in Bebauungsplänen – umgesetzt oder freiwillig?  
*Were these measures implemented due to city requirements (e.g., in development plans) or voluntarily?*

Welche Informationsmaterialien für die Bevölkerung, insbesondere für Grundstückseigentümer, zum Thema Überflutungsvorsorge und Klimaanpassung gibt es bereits?

*What informational materials are already available to the public — especially property owners — regarding flood prevention and climate adaptation?*

### Öffentliche Flächen

#### *Public areas*

Das Rathausdach in Mörfelden wird bereits begrünt und es sind auch weitere Dachbegrünungen auf öffentlichen Gebäuden, wie z. B. dem neuen Feuerwehrgebäude in Walldorf, geplant. Welche weiteren konkreten Maßnahmen der dezentralen Regenwasserbewirtschaftung wurden von der Stadt selbst schon umgesetzt oder sind in Planung?

*The roof of the town hall in Mörfelden is already greened, and further green roofs on public buildings — such as the new fire station in Walldorf — are planned. What other specific decentralized rainwater management measures have been implemented by the city or are currently planned?*

- Wurden bereits städtische Flächen entsiegelt?  
Have any municipal areas been unsealed?
- Gibt es Multifunktionale Retentionsflächen – wie z. B. tieferliegende Spielplätze, die bei Starkregen überschwemmt werden – oder sind solche geplant?  
*Are there any multifunctional retention areas — such as sunken playgrounds that are designed to flood during heavy rainfall events — or are such measures planned?*
- Gibt es generell ausgewiesene Retentionsflächen?  
*Are there designated retention areas in general?*
- Gab es bereits Überlegungen, bestimmte Straßen als Notwasserwege auszuweisen, um bei Starkregen gezielt das Wasser abzuleiten?  
*Have there been considerations to designate certain streets as emergency water pathways, to channel water in a controlled manner during heavy rainfall?*

---

## Block 6: Hydrodynamic Modeling

---

Generalentwässerungsplan 2012

General Drainage Plan 2012

Können Sie kurz erläutern, was damals berechnet wurde und wie vorgegangen wurde?

Could you briefly explain what was calculated at the time and how the process was carried out?

- Was war die Datengrundlage und welches Modell wurde verwendet?  
What was the data basis, and which model was used?
- Wurden Außengebietszuflüsse berücksichtigt? Oder spielen sie wegen der Topographie sowieso keine Rolle?  
Were inflows from surrounding areas (external catchments) taken into account? Or are they irrelevant due to the local topography?
- Sind neben dem Katalog der Sanierungsmaßnahmen weitere Dokumente wie z. B. ein Erläuterungsbericht zur Erstellung des GEP öffentlich zugänglich?  
In addition to the catalogue of rehabilitation measures, are there any other documents — such as an explanatory report — publicly available from the creation of the GEP?
- Niederschlag-Abfluss-Modell: An wie vielen Stellen wurde es durchgeführt? Diente es der Kalibrierung des Modells?  
Rainfall-runoff model: At how many locations was it applied? Was it used for model calibration?
- Inwiefern wurden Erfahrungswerte von vergangenen Starkregenereignissen mit einbezogen?  
To what extent were insights from past heavy rainfall events incorporated?

Wurden mittlerweile weitere Maßnahmen umgesetzt bzw. sind in Planung?

Have additional measures been implemented or are they currently being planned?
